1 **Title:** Environmental Exposures Influence Nasal Microbiome Composition in a Longitudinal  
2 Study of Division I Collegiate Athletes

3 **Authors:** Oliver Kask<sup>1</sup>, Shari Kyman<sup>1</sup>, Kathryn A. Conn<sup>1</sup>, Jenny Gormley<sup>2</sup>, Julia Gardner<sup>2</sup>,  
4 Robert A. Johns<sup>3</sup>, J. Gregory Caporaso<sup>1</sup>, Dierdra Bycura<sup>4</sup>, Jay T. Sutcliffe<sup>2</sup>, Emily K. Cope<sup>1\*</sup>

5

6 **Affiliations.**

7 <sup>1</sup>Center for Applied Microbiome Science, The Pathogen and Microbiome Institute, Northern  
8 Arizona University, Flagstaff, AZ 86011

9 <sup>2</sup>PRANDIAL Lab: Department of Health Sciences, Northern Arizona University, Flagstaff, AZ  
10 86011

11 <sup>3</sup>Northern Arizona University Athletics, Northern Arizona University, Flagstaff, AZ 86011

12 <sup>4</sup>Department of Health Sciences-Fitness Wellness, Northern Arizona University, Flagstaff, AZ  
13 86011

14

15 **\*Corresponding Author.**

16 Emily K. Cope

17 Center for Applied Microbiome Sciences

18 The Pathogen and Microbiome Institute

19 Department of Biological Sciences

20 Northern Arizona University

21 Flagstaff, AZ 86011

22 [Emily.Cope@nau.edu](mailto:Emily.Cope@nau.edu)

23 928-523-6004

24

25 **Keywords:** athlete, microbiome, nasal microbiome, anterior nares, chlorine exposure

26 microbiome, microbiota

27 **Abstract.**

28 *Background.*

29 The anterior nares host a complex microbial community that contributes to upper airway health.  
30 Although the bacterial composition of the nasal passages have been well characterized in  
31 healthy and diseased cohorts, the role of prolonged environmental exposures and exercise in  
32 shaping the nasal microbiome in healthy adults is poorly understood. In this study, we  
33 longitudinally sampled female collegiate Division I athletes from two teams experiencing a  
34 similar athletic season and exercise regimen but vastly different environmental exposures  
35 (Swim/Dive and Basketball). Using 16S rRNA gene sequencing, we evaluated the longitudinal  
36 dynamics of the nasal microbiome pre-, during-, and at the end of the athletic season.

37 *Results.*

38 The nasal microbiota of the Swim/Dive and Basketball teams were distinct from each other at  
39 each time point sampled, driven by either low abundance (Jaccard, PERMANOVA  $p < 0.05$ ) or  
40 high-abundance changes in composition (Bray-Curtis, PERMANOVA  $p < 0.05$ ). The rate of  
41 change of microbial communities were greater in the Swim/Dive team compared to the  
42 Basketball team characterized by an increase in *Staphylococcus* in Swim/Dive and a decrease  
43 in *Corynebacterium* in both teams over time.

44 *Conclusions.*

45 This is the first study that has evaluated the nasal microbiome in athletes. We obtained  
46 longitudinal nasal swabs from two gender-matched teams with similar age distributions (18-22  
47 years old) over a 6 month period. Differences in the microbiota between teams and over time  
48 indicate that chlorine exposure, and potentially athletic training, induced changes in the nasal  
49 microbiome.

50

51

52

## 53 **Background.**

54           The human microbiome is defined as the collection of genomes contained within the  
55 bacteria, viruses, and fungi that inhabit nearly every niche in the body [1,2]. Recent advances in  
56 sequencing and bioinformatics technologies have vastly expanded our collective understanding  
57 of the contributions of resident microbiota to host health. Mechanistically, bacterial, viral, and  
58 fungal microbiota interact with the host to influence health or disease status through direct  
59 interaction with immune cells, indirect immune modulation through the production of metabolites  
60 such as short-chain fatty acids (SCFAs), and by contributing to mucosal epithelial barrier  
61 integrity [3–7]. The role of upper airway microbiota, including nasal microbiota, to host health is  
62 of interest, however, the dynamics of the nasal microbiota over time and under distinct  
63 environmental conditions are not well understood.

64           The nasal passages are a first site of contact with the external environment. In this role,  
65 the nasal microbiome has been associated with upper and lower airway health status, including  
66 upper respiratory tract infections, asthma, and *Staphylococcus aureus* pathogen carriage [8,9].  
67 While a common feature of nasal microbiome composition is the dominance of  
68 *Corynebacterium*, *Staphylococcus*, and *Propionibacterium*, recent studies have identified that  
69 ecological succession and colonization patterns within individuals are associated with host  
70 health status [8–10]. A longitudinal study of 200 children demonstrated that early life succession  
71 patterns of the nasopharyngeal microbiome relate to risk of acute respiratory infection (ARI).  
72 Children with nasopharyngeal communities dominated by *Streptococcus*, *Moraxella*, or  
73 *Haemophilus* were associated with ARI, and early colonization with *Streptococcus* was a strong  
74 predictor of asthma development by 5-10 years of age [11]. The nasal passages are also an  
75 important niche for human pathobionts. Up to 20% of humans are carriers of *S. aureus* in their  
76 nares and nasal microbiota colonization patterns can influence *S. aureus* carriage [12].  
77 *Corynebacterium accolens* and *Corynebacterium pseudodiphthericum* presence in the nasal  
78 cavity are negatively associated with persistent *S. aureus* carriage, and these organisms

79 compete *in vitro* [13]. *C. accolens* also exhibits anti-pneumococcal activity through the  
80 production of free fatty acids from nostril triacylglycerols [14]. Thus, understanding host and  
81 environmental factors underlying nasal microbiota structure are important for respiratory health.

82 Competitive athletes, especially those who are chronically exposed to allergens,  
83 pollutants, or environmental stressors, are susceptible to upper and lower airway damage  
84 leading to airway hyperresponsiveness [15]. Chlorine is an inexpensive reagent used in most  
85 swimming pools as a disinfectant and it reacts with organic matter to produce derivatives such  
86 as chloramines and gaseous nitrogen trichloride (NCl<sub>3</sub>) [16]. Although concentrations of  
87 chlorine byproducts are regulated by the World Health Organization, chronic exposure may lead  
88 to damage or irritation of the airway mucosa. Indeed, competitive, elite swimmers have a higher  
89 prevalence of upper respiratory symptoms including rhinitis and allergen sensitization  
90 [15,17,18]. A small study of 69 elite swimmers and non-swimmers demonstrated that up to 74%  
91 of swimmers report rhinitis compared to 40% of non-swimmers [17]. Upper airway symptoms  
92 can lead to poor performance and decreased quality of life [19]. Recent studies have shown that  
93 nasal microbiome composition is directly related to rhinitis and asthma [20–22]. Thus, we  
94 hypothesized that the composition or diversity of the nasal microbiota during the course of an  
95 athletic season would be altered in competitive elite swimmers compared to age- and gender-  
96 matched athletes who are not exposed to chlorine or chlorine byproducts.

97 Our understanding of factors that alter the nasal microbiota continue to be investigated  
98 but gaps still remain. For example, whether common environmental exposures alter microbial  
99 dynamics or composition in healthy, active adults is poorly understood. Temporal changes in the  
100 nasal microbiome in age and gender-matched groups exposed to distinct environmental  
101 pressures have not been extensively studied. Here, we evaluate temporal dynamics of the  
102 bacterial microbiome in NCAA Division I collegiate athletes chronically exposed to chlorinated  
103 water (Swim and Dive) compared to those who are unexposed to chlorine (Basketball).

104

105 **Results.**

106 **Participant Characteristics.**

107 A total of 47 subjects ages 18-22 participated in this study. All subjects were female  
108 collegiate-level NCAA Division I athletes during their competitive seasons. To determine  
109 whether prolonged chlorine exposure altered nasal microbiome composition, we recruited  
110 individuals from swim and dive and compared to female subjects on a basketball team so that  
111 microbiome comparisons matched to the same age range and athletic aptitude. Participants  
112 provided 2-5 nasal swabs at approximately one-month intervals (Fig. 1).

113 Nasal swabs from participants yielded a total of 16,971,801 16S rRNA gene sequences  
114 (median per sample: 69,005, range per sample: 1,500-554,058). A total of 178 samples were  
115 sequenced, three samples were removed due to low sequence depth (<2,771  
116 sequences/sample). Therefore, 175 specimens were included in this study.

117

118 **Compositional alterations in the nasal microbiome in chlorine exposed athletes.**

119 Alpha diversity, measured by richness (observed ASVs) did not significantly change in  
120 chlorine-exposed (Swim and Dive) vs. chlorine-unexposed (Basketball) collegiate athletes over  
121 time (Fig. 2A, Additional Figure 1). Microbial volatility analysis was used to evaluate the rate of  
122 change in nasal microbiome richness (observed ASVs) over successive time points within the  
123 same individual. There was no significant change in bacterial richness at the final time point  
124 when compared to sampling baseline time point 1 [Fig. 2A, Additional Figure 1,  $p=0.394$   
125 (Swim/Dive) and  $p=0.935$  (Basketball), Wilcoxon Signed Rank Test] or to prior timepoints (Fig.  
126 1B, Additional Figure 1,  $p>0.05$ , Wilcoxon Signed Rank Test).

127 Multivariate analysis (PERMANOVA) of nasal bacterial beta diversity demonstrated a  
128 significant change in the athlete nasal microbiome composition between teams. To account for  
129 repeated measures, we filtered the feature table by sampling time point corresponding to  
130 overlapping season between teams [Fall (October, temperature in Flagstaff on day of sampling:

131 73 °F), Winter (November/December, temperatures 42 and 52 °F), and Spring (March,  
132 temperature 66 °F)]. We chose to perform this analysis at timepoints that corresponded to  
133 overlapping months, instead of sampling (see Fig. 1), to control for seasonal variation in nasal  
134 microbiome beta diversity, which has been previously described [23,24]. Indeed, when  
135 timepoints were compared without correction for season, we observed less robust clustering by  
136 team when sampling number spanned seasons (when we compare T3 for Swim/Dive in October  
137 v. T3 Basketball in January, and T4 Swim/Dive in November v. T4 Basketball in March;  
138 Additional Table 1).

139 Significant differences in nasal microbiome composition between individuals, grouped by  
140 athletic team, were observed using abundance-weighted (Bray-Curtis) and unweighted  
141 (Jaccard) beta diversity metrics. In Fall (October) we observed robust clustering by team with  
142 Jaccard ( $p=0.002$ , PERMANOVA, Table 2, Fig. 2C, Additional Figure 2), and Bray-Curtis  
143 ( $p=0.042$ , PERMANOVA, Table 2, Fig. 2D) metrics. In the winter (November/December), we  
144 observed significant differences when an unweighted metric was used (Jaccard,  $p=0.021$ ,  
145 PERMANOVA, Table 2) but not when a weighted metric was used (Bray-Curtis,  $p=0.051$ ,  
146 PERMANOVA, Table 2) indicating that, at this time point, low abundance features are joining or  
147 leaving the community (either physically, or their abundance is changing in a way that is  
148 relevant to our detection threshold). At the final overlapping time point in spring (March),  
149 bacterial communities between the two teams were significantly different when using a weighted  
150 metric (Bray-Curtis,  $p=0.031$ , PERMANOVA, Table 2), but not an unweighted metric (Jaccard,  
151  $p=0.284$ , PERMANOVA, Table 2). Together, these results suggest that nasal microbiome alpha-  
152 diversity (richness and evenness) is relatively stable, but that compositional changes in bacterial  
153 communities are apparent between athletic teams, possibly due to chronic exposure to  
154 chlorinated water. That we observe the greatest compositional difference between teams at the  
155 beginning of the athletic season suggests that training and exercise generally may have a  
156 consistent impact on the microbial composition of the nasal cavity independent of sport.

157

158 Table 2. Multivariate analysis of beta diversity dissimilarity metrics by athletic team at each  
159 sampling point

| Distance Metric    | Sampling Time Point      | pseudo-F    | PERMANOVA<br>p value |
|--------------------|--------------------------|-------------|----------------------|
| <b>Bray-Curtis</b> | <b>October</b>           | <b>1.82</b> | <b>0.042</b>         |
| <b>Jaccard</b>     | <b>October</b>           | <b>1.32</b> | <b>0.002</b>         |
| Bray-Curtis        | November/December        | 1.69        | 0.051                |
| <b>Jaccard</b>     | <b>November/December</b> | <b>1.35</b> | <b>0.021</b>         |
| <b>Bray-Curtis</b> | <b>March</b>             | <b>2.18</b> | <b>0.031</b>         |
| Jaccard            | March                    | 1.05        | 0.284                |

160

161 **Environmental exposures are associated with reduced bacterial microbiome stability.**

162 Next, we sought to determine how microbiome composition changes within an individual  
163 over time and whether chronic exposure to chlorinated water alters microbial stability, defined  
164 here as the magnitude of change in community dissimilarity metrics within an individual. We  
165 used q2-longitudinal[25]. to examine how community dissimilarity metrics changed in each  
166 individual between successive time points in each athletic team (Fig. 3). The magnitude of  
167 change in Jaccard and Bray-Curtis dissimilarity indices increased at the final timepoint (March)  
168 in the Swim/Dive team, indicating that the rate of change of beta diversity was greater in  
169 individuals exposed to chlorinated water (Fig. 3A, Fig. 3B). Bray-Curtis and Jaccard indices  
170 remained stable (Fig. 3A) or decreased (Fig. 3B) in the basketball team, indicating more similar  
171 bacterial communities within an individual over time. The magnitude of change in Jaccard  
172 dissimilarity metric was significantly greater in individuals on the Swim/Dive team than in

173 individuals on the Basketball team between the first and final time points (Jaccard  $p=0.008$ ,  
174 Mann-Whitney U; Bray-Curtis  $p=0.466$ , Mann-Whitney U).

175 To identify important features (e.g. taxa) that change in abundance over time in each  
176 athletic team, we used a supervised learning regressor as implemented in q2-longitudinal  
177 feature volatility analysis (Random Forest Regressor, model accuracy  $p=0.000003$ , Mean  
178 Squared Error=0.300,  $r^2=0.622$  [25]). Two low-abundance features were strong predictors of  
179 sampling time point in each team: TM6 increased over time (feature importance score=0.180,  
180 net average change=0.0002) and unclassified *Bacillaceae* decreased over time (feature  
181 importance score=0.079, net average change=-0.0922). Two of the highest abundance features  
182 were *Staphylococcus* and *Corynebacterium* (Additional Figure 3) and were also strong  
183 predictors of sampling time point. *Staphylococcus* was ranked third in feature importance and  
184 on average, increased over time with a higher rate of increase in individuals on the Swim/Dive  
185 team (feature importance score=0.064, net average change=0.1442; Fig. 4A). The second most  
186 abundant feature, *Corynebacterium*, decreased in each athletic team over time in both teams  
187 (feature importance score=0.008, net average change=-0.1070; Fig. 4B). These results support  
188 our prior finding that compositional differences are driven by high-abundance taxonomic  
189 changes between athletic teams at the final sampling time point.

190 Evaluating changes in individual features is important, however microbial communities  
191 exist within a complex ecological framework comprised of competing, commensal, and  
192 mutualistic interactions. Thus, microbes do not change in response to environmental pressures  
193 in isolation. To determine whether networks of bacteria change over time in athletes exposed to  
194 chlorinated water, we used a nonparametric microbial interdependence test (NMIT) [26]. as  
195 implemented in q2-longitudinal [25]. to determine whether distinct networks of interdependent  
196 ASVs change within each group (swim and dive v. basketball). To ensure robust microbial  
197 interdependence networks, we excluded individuals with fewer than 3 sampling timepoints.  
198 NMIT demonstrated the microbiome of swimmers and divers exhibited similar temporal



199 characteristics, or similar networks of bacteria changing, when compared to individuals on a  
200 basketball team (Additional Figure 4, PERMANOVA pseudo-F 1.22,  $p=0.022$ ). These results  
201 suggest that networks of microbiota may change in response to chronic chlorine exposure.

202 Athletes on the Swim/Dive and Basketball teams were asked to complete a Sinonasal  
203 Outcomes Test (SNOT-22), a validated questionnaire that surveys nasal, behavioural, and  
204 sleep symptoms. We evaluated microbiome alpha diversity and nasal symptoms (the sum of  
205 SNOT-22 questions 1-7). Higher values indicate worse nasal symptoms. There was not a  
206 significant difference in nasal symptom scores between teams ( $p=0.117$ , Welch's t-test of  
207 averaged SNOT-22 score for each individual) though a larger sample size may be needed to  
208 identify this association. We also evaluated whether an increase in nasal symptoms was  
209 correlated with decreased alpha diversity using repeated measures correlation (rmcorr) in R  
210 [27]., as has been demonstrated in the sinonasal cavity in sinusitis [28]. We observed a weak  
211 but non-significant negative correlation overall ( $r^2= -0.117$ ,  $p=0.261$ ) and in the Swim/Dive team  
212 ( $r^2=0.029$ ,  $p=0.868$ , Additional Figure 5). We observed no correlation between SNOT-22 and  
213 richness in individuals on the basketball team ( $r^2= 0.029$ ,  $p=0.868$ ). Our results therefore do not  
214 illustrate a relationship between SNOT-22 scores and alpha diversity, but we expect that a  
215 larger sample size including individuals with diagnosed upper respiratory disease might  
216 elucidate a relationship.

217

## 218 **Discussion.**

219 We demonstrated that healthy, Division I NCAA athletes who are chronically exposed to  
220 chlorinated water (Swim and Dive) have distinct microbial community composition, but not alpha  
221 diversity, during the active season when compared to athletes who are not exposed to  
222 chlorinated water (Basketball). Both teams were comprised of healthy, female athletes, aged  
223 18-22. The nasal microbiota of individuals on the Swim and Dive team were compositionally  
224 less similar to their baseline sample over time, while the nasal microbiota of individuals on the

225 Basketball team was compositionally more similar to their baseline sample over time. This was  
226 expected, since the Swim and Dive nasal microbial community was exposed to chronic  
227 antimicrobial pressures via chlorination and chlorine byproducts, presumably strong drivers of  
228 bacterial composition. In this study, causality of chlorine exposure alterations to the nasal  
229 microbiome could not be determined since the nasal microbiome composition of each team was  
230 distinct at the start of the study, possibly due to years of chlorine exposure prior to joining an  
231 NCAA Division I swim and dive team.

232 Previous studies have demonstrated an increased prevalence of allergic rhinitis, asthma,  
233 and allergies in elite athletes exposed to irritants and chlorinated water [18,29,30]. These  
234 studies are intriguing, but are limited in scope and unable to detect specific mechanistic  
235 pathways by which chronic exposure to low levels of chlorine and chlorine derivatives drive  
236 airway disease. It's unclear whether athletes choose an athletic career in the pool because of  
237 underlying airway issues, such as asthma, or whether exposure to chlorine and byproducts  
238 precedes disease. We hypothesized that altered nasal microbiome composition may contribute  
239 to airway disease, as has been previously described in patients with AR and asthma [9,20,21].  
240 While we have not mechanistically demonstrated this in the current study, our results suggest  
241 that elite athletes exposed to chlorinated water have altered microbial composition. Specifically,  
242 we demonstrated that the rate of change in Jaccard and Bray-Curtis distances increased in the  
243 Swim/Dive team over time, indicating that the nasal microbiota of participants on the Swim and  
244 Dive team became less similar than their previous sampling point as the season progressed. In  
245 contrast, the rate of change in distances was smaller in participants on the basketball team,  
246 indicating that the nasal microbiota did not change or became more similar to their previous  
247 sampling time points. When we computed differences from baseline and final sampling points,  
248 we observed significant differences in proportions of OTUs shared between samples (Jaccard);  
249 Swim/Dive athletes nasal microbiota shared fewer taxa with their baseline sample at the final

250 time point whereas Basketball athletes nasal microbiota became shared more taxa with their  
251 baseline sample at the final time point.

252 We observed bacterial taxa that were predictive of sampling time point in each team.  
253 Most notably, *Staphylococcus* abundance increased in abundance in Swim/Dive participants  
254 over time, but *Corynebacterium* decreased over time in both teams, perhaps as a general  
255 consequence of athletic training. *Corynebacterium* species are commensal and potentially  
256 beneficial in the anterior nares so we were surprised to observe a decrease in *Corynebacterium*  
257 relative abundance throughout the athletic season. An antagonistic relationship between  
258 *Staphylococcus* and *Corynebacterium* has been observed in nasal microbiome and *in vitro*  
259 studies [13,28,31–33]. *Corynebacterium* can inhibit *Staphylococcus aureus* growth through  
260 secretion of anti-Staphylococcal factors [33]. and can shift the behavior of *S. aureus* toward  
261 commensalism when in a polymicrobial community by inhibiting the quorum sensing signal,  
262 accessor gene regulator (*agr*) [34]. Future studies should be aimed at understanding the health  
263 implications of increased *Staphylococcus* burden in collegiate and professional swimmers. In  
264 addition, we did not assess the effect of chlorinated, saltwater, or freshwater on the nasal  
265 microbiota, which should also be the focus of future studies.

266 This is the first study that has evaluated the nasal microbiome in athletes. We obtained  
267 longitudinal nasal swabs from two gender-matched teams with similar age distributions (18-22  
268 years old) over an approximately 6 month period. The limitations of our study include uneven  
269 periods between sampling, though we were able to sample in three seasons (Fall, Winter,  
270 Spring) for each team. We also recognize that this study was performed with a relatively small  
271 sample size (n=47 total participants), so we may not have statistical power to detect true  
272 changes in the microbiome at each timepoint. Finally, we were unable to include a healthy, non-  
273 athlete cohort in this initial study. We are currently recruiting healthy, non-athletes to determine  
274 whether we observe changes in the nasal microbiome due to athletic status. Although this  
275 question has not been determined in the nasal microbiota, a recent study evaluating the skin

276 microbiome showed major shifts in athletes playing a contact sport (roller derby) [35]. In future  
277 studies, we will also measure nasal fungal microbiota to determine whether networks of bacteria  
278 and fungi are influenced by environmental exposures. The inclusion of a healthy cohort of  
279 individuals exposed to chlorinated water represents an exciting opportunity to evaluate the  
280 stability of the nasal microbiota under environmental pressures.

281

## 282 **Materials and Methods.**

283 *Subject Recruitment.* NCAA Division I female athletes ages 18-22 were recruited from a  
284 collegiate Swim and Dive and Basketball team in Arizona under approved IRBs 982568-4 and  
285 982568-14. Inclusion criteria included active membership of each athletic team and general  
286 good health. No exclusionary criteria were developed for this study, as all NCAA athletes are  
287 required to complete yearly athletic physicals to screen for possible health risks. Individuals  
288 were not excluded based on prior diagnosis of airway disease, but prior physician's diagnosis  
289 and current nasal symptoms were recorded as metadata and used in subsequent analyses.  
290 Fifteen members of the basketball team and 32 members of Swim and Dive participated. Up to  
291 5 timepoints (a minimum of 2 timepoints) were collected per individual throughout the course of  
292 the athletic season. Nasal specimens were obtained at approximately 1-month intervals. A total  
293 of 178 nasal specimens were processed for bacterial microbiome sequencing. The active  
294 seasons for each team were similar; Swim and Dive meets occur September to March and  
295 Basketball games occur November to March. Athletes on the Swim/Dive and Basketball teams  
296 were asked to complete a Sinonasal Outcomes Test (SNOT-22), a validated questionnaire that  
297 surveys nasal, behavioral, and sleep symptoms [36].

298

299 *Nasal Specimen Collection and DNA extraction.*

300 Nasal bacterial samples were collected using a BBL CultureSwab (Becton, Dickinson and  
301 Company, Sparks, MD). Participants were instructed to swab their anterior nares with both swab

302 tips for 10-15 seconds per nostril. Swabs were transported to a -80 °C freezer and stored until  
303 DNA extraction. Nasal samples were randomized into five extraction sets. Total DNA was  
304 extracted from nasal swabs using DNeasy PowerSoil Kit (Qiagen Hilden, Germany) using  
305 manufacturer's protocol with one modification; to facilitate microbial lysis, swabs were incubated  
306 in lysis buffer for 10 minutes at 65 °C before sample vortexing. Resulting DNA samples were  
307 quantified on the Nanodrop 8000 Spectrophotometer (ThermoFisher Waltham, MA).

308

309 *16S rRNA gene sequencing.*

310 Amplicon sequencing of the 16S rRNA gene for sequencing on the MiSeq Illumina platform was  
311 done using the protocol from the Earth Microbiome Project [37]. Barcoded 806R reverse primers  
312 and forward primer 515F were used to amplify the V4 region of the 16S rRNA gene [38]. Library  
313 preparation was done at the Pathogen and Microbiome Institute and sequencing was performed  
314 at the Translational Genomics Research Institute (TGen) Pathogen and Microbiome Division.  
315 PCR conditions were as follows: 2 minutes at 98 °C for 1 cycle; 20 seconds at 98 °C, 30  
316 seconds at 50 °C, and 45 seconds at 72 °C for 30 cycles; and 10 minutes at 72 °C for 1 cycle.  
317 PCR product was purified using AMPure XP for PCR Purification (Beckman Coulter  
318 Indianapolis, IN), quantified using Qubit dsDNA HS Assay Kit (ThermoFisher Waltham, MA),  
319 and pooled at 25 ng/sample for sequencing. If extraneous DNA bands (human or mitochondrial)  
320 were present, the samples were run on an EGel size-select gel (ThermoFisher Invitrogen,  
321 Waltham, MA) prior to pooling. Extraction blank negative controls were included in each  
322 extraction set (five total) and sequenced with the pool of nasal samples. A negative control for  
323 each barcoded primer was also run and visualized on a gel. If contamination was observed in  
324 the negative well, the sample was run with a new barcoded primer.

325

326 *Microbiome Bioinformatics.*

327 16S rRNA gene sequences were analyzed using Quantitative Insights Into Microbial Ecology 2  
328 (QIIME 2) 2019.10 [39]. Paired end sequences were demultiplexed, then denoised, chimera  
329 checked and grouped into Amplicon Sequence Variants (ASVs) based on 100% sequence  
330 identity using dada2 [40]. Sequences were aligned using MAFFT [41] and a phylogenetic tree  
331 was built using FastTree 2 [42]. Taxonomy was assigned to each ASV using a Naive Bayes  
332 classifier[43]. trained on Greengenes 13\_8 99% OTUs [44]. Richness (observed OTUs), Faith's  
333 Phylogenetic Diversity [45], and Shannon diversity were used to assess alpha diversity.  
334 Jaccard, Bray-Curtis, Weighted and Unweighted UniFrac [46] metrics were used to assess beta  
335 diversity. Longitudinal analysis was performed using the q2-longitudinal plugin [25]. Volatility  
336 analysis was used to determine how metrics (e.g. alpha diversity or beta diversity) changed over  
337 the sampling period [25].

338

### 339 *Statistical Analysis.*

340 In order to include the maximum number of longitudinal sampling points, we rarefied samples to  
341 an even sampling depth of 2,771 sequences/sample. Three samples were removed at this step  
342 due to low sequence depth. Kruskal-Wallis was used to evaluate changes in alpha diversity  
343 (richness, shannon, Faith's PD) across each team within one time point [47]. Permutational  
344 analysis of variance (PERMANOVA) was used to compare beta diversity (Bray-Curtis, Jaccard,  
345 Weighted Unifrac, Unweighted UniFrac) across teams at each time point [48]. Pairwise  
346 comparisons in alpha diversity were made for each pair of samples between successive  
347 timepoints using a Wilcoxon Signed Rank Test as implemented in q2-longitudinal [25]. A Mann-  
348 Whitney U test was used to assess whether distance (using a beta diversity distance matrix)  
349 between successive timepoints were significantly different between each team over time.  
350 Finally, Repeated Measures Correlation using rmcrr in R version 1.2.1335 was used to assess  
351 the relationship between alpha diversity and the sum of the questions 1-7 on the SNOT-22  
352 questionnaire, which evaluates nasal symptoms [27]. To identify important features (e.g. taxa)

353 that change in abundance over time in each athletic team, we used a random forest supervised  
354 learning regressor with 5-fold cross validation and 100 estimator trees, as implemented in q2-  
355 longitudinal feature volatility analysis on a feature table collapsed to the genus level [25].

## 356 **Declarations**

357 **Ethics approval and consent to participate:** NCAA Division I female athletes ages 18-22  
358 were recruited from a collegiate Swim and Dive and Basketball team in Arizona under approved  
359 IRBs 982568-4 and 982568-14.

360 **Consent for publication:** Not applicable

361 **Availability of data and material:** Sequence data for this study have been deposited in the  
362 NCBI Short Read Archive (SRA) under BioProject ID PRJNA605856.

363 **Competing interests:** The authors declare that they have no competing interests.

364 **Funding:** This study was funded by Arizona TRIF and Eric M. Lehrman 2015 Trust.

365 Authors' contributions

366 **Acknowledgements:** We would like to thank the athletes who provided nasal samples for this  
367 study and their coaches for their support of this project.

368 Authors' information (optional)

369 **Author's Contributions:** OK and SK performed library preparation. OK and EKC analyzed  
370 sequence data. EKC and JGC interpreted sequence data. EKC, OK, and KAC wrote and edited  
371 the manuscript. EKC, DB, JTS and RAJ conceived and designed the study. All authors read and  
372 approved the final manuscript

373  
374  
375  
376  
377  
378  
379  
380  
381  
382  
383  
384  
385  
386  
387  
388  
389  
390  
391

392 **References.**

- 393 1. Human Microbiome Project Consortium. Structure, function and diversity of the healthy  
394 human microbiome. *Nature*. 2012;486:207–14.
- 395 2. Sender R, Fuchs S, Milo R. Revised Estimates for the Number of Human and Bacteria Cells  
396 in the Body. *PLoS Biol*. 2016;14:e1002533.
- 397 3. Li M, Wang B, Zhang M, Rantalainen M, Wang S, Zhou H, et al. Symbiotic gut microbes  
398 modulate human metabolic phenotypes [Internet].. *Proceedings of the National Academy of*  
399 *Sciences*. 2008. p. 2117–22. Available from: <http://dx.doi.org/10.1073/pnas.0712038105>
- 400 4. Ivanov II, Honda K. Intestinal commensal microbes as immune modulators. *Cell Host*  
401 *Microbe*. 2012;12:496–508.
- 402 5. Narushima S, Sugiura Y, Oshima K, Atarashi K, Hattori M, Suematsu M, et al.  
403 Characterization of the 17 strains of regulatory T cell-inducing human-derived Clostridia. *Gut*  
404 *Microbes*. 2014;5:333–9.
- 405 6. Smith PM, Howitt MR, Panikov N, Michaud M, Gallini CA, Bohlooly-Y M, et al. The microbial  
406 metabolites, short-chain fatty acids, regulate colonic Treg cell homeostasis. *Science*.  
407 2013;341:569–73.
- 408 7. Hsiao EY, McBride SW, Hsien S, Sharon G, Hyde ER, McCue T, et al. Microbiota modulate  
409 behavioral and physiological abnormalities associated with neurodevelopmental disorders. *Cell*.  
410 2013;155:1451–63.
- 411 8. Liu CM, Price LB, Hungate BA, Abraham AG, Larsen LA, Christensen K, et al.  
412 *Staphylococcus aureus* and the ecology of the nasal microbiome. *Sci Adv*. 2015;1:e1400216.
- 413 9. Pérez-Losada M, Castro-Nallar E, Bendall ML, Freishtat RJ, Crandall KA. Dual  
414 Transcriptomic Profiling of Host and Microbiota during Health and Disease in Pediatric Asthma.  
415 *PLoS One*. 2015;10:e0131819.
- 416 10. Wilson MT, Hamilos DL. The nasal and sinus microbiome in health and disease. *Curr*  
417 *Allergy Asthma Rep*. 2014;14:485.
- 418 11. Teo SM, Mok D, Pham K, Kusel M, Serralha M, Troy N, et al. The infant nasopharyngeal  
419 microbiome impacts severity of lower respiratory infection and risk of asthma development. *Cell*  
420 *Host Microbe*. 2015;17:704–15.
- 421 12. van Belkum A, Verkaik NJ, de Vogel CP, Boelens HA, Verveer J, Nouwen JL, et al.  
422 Reclassification of *Staphylococcus aureus* nasal carriage types. *J Infect Dis*. 2009;199:1820–6.
- 423 13. Yan M, Pamp SJ, Fukuyama J, Hwang PH, Cho D-Y, Holmes S, et al. Nasal  
424 microenvironments and interspecific interactions influence nasal microbiota complexity and *S.*  
425 *aureus* carriage. *Cell Host Microbe*. 2013;14:631–40.
- 426 14. Bomar L, Brugger SD, Yost BH, Davies SS, Lemon KP. *Corynebacterium accolens*  
427 Releases Antipneumococcal Free Fatty Acids from Human Nostril and Skin Surface  
428 Triacylglycerols. *MBio*. 2016;7:e01725–15.
- 429 15. Zwick H, Popp W, Budik G, Wanke T, Rauscher H. Increased sensitization to aeroallergens



- 430 in competitive swimmers. *Lung*. 1990;168:111–5.
- 431 16. Organization WH, Others. Guidelines for safe recreational water environments. Volume 2:  
432 Swimming pools and similar environments. World Health Organization; 2006.
- 433 17. Bougault V, Turmel J, Boulet LP. Effect of intense swimming training on rhinitis in high-level  
434 competitive swimmers [Internet].. *Clinical & Experimental Allergy*. 2010. p. 1238–46. Available  
435 from: <http://dx.doi.org/10.1111/j.1365-2222.2010.03551.x>
- 436 18. Gelardi M, Ventura MT, Fiorella R, Fiorella ML, Russo C, Candreva T, et al. Allergic and  
437 non-allergic rhinitis in swimmers: clinical and cytological aspects. *Br J Sports Med*. 2012;46:54–  
438 8.
- 439 19. Meltzer EO. Quality of life in adults and children with allergic rhinitis. *J Allergy Clin Immunol*.  
440 2001;108:S45–53.
- 441 20. Choi CH, Poroyko V, Watanabe S, Jiang D, Lane J, deTineo M, et al. Seasonal allergic  
442 rhinitis affects sinonasal microbiota. *Am J Rhinol Allergy*. [journals.sagepub.com](http://journals.sagepub.com); 2014;28:281–  
443 6.
- 444 21. Durack J, Huang YJ, Nariya S, Christian LS, Ansel KM, Beigelman A, et al. Bacterial  
445 biogeography of adult airways in atopic asthma. *Microbiome*. 2018;6:104.
- 446 22. Fazlollahi M, Lee TD, Andrade J, Oguntuyo K, Chun Y, Grishina G, et al. The nasal  
447 microbiome in asthma. *J Allergy Clin Immunol*. 2018;142:834–43.e2.
- 448 23. Pérez-Losada M, Alamri L, Crandall KA, Freishtat RJ. Nasopharyngeal Microbiome Diversity  
449 Changes over Time in Children with Asthma [Internet].. *PLOS ONE*. 2017. p. e0170543.  
450 Available from: <http://dx.doi.org/10.1371/journal.pone.0170543>
- 451 24. Santee CA, Nagalingam NA, Faruqi AA, DeMuri GP, Gern JE, Wald ER, et al.  
452 Nasopharyngeal microbiota composition of children is related to the frequency of upper  
453 respiratory infection and acute sinusitis [Internet].. *Microbiome*. 2016. Available from:  
454 <http://dx.doi.org/10.1186/s40168-016-0179-9>
- 455 25. Bokulich N, Zhang Y, Dillon M, Rideout JR, Bolyen E, Li H, et al. q2-longitudinal: a QIIME 2  
456 plugin for longitudinal and paired-sample analyses of microbiome data [Internet].. *bioRxiv*. 2017  
457 [cited 2017 Dec 4].. p. 223974. Available from:  
458 <https://www.biorxiv.org/content/early/2017/11/22/223974.abstract>
- 459 26. Zhang Y, Han SW, Cox LM, Li H. A multivariate distance-based analytic framework for  
460 microbial interdependence association test in longitudinal study. *Genet Epidemiol*. Wiley Online  
461 Library; 2017;41:769–78.
- 462 27. Bakdash JZ, Marusich LR. Repeated Measures Correlation. *Front Psychol*. 2017;8:456.
- 463 28. Cope EK, Goldberg AN, Pletcher SD, Lynch SV. Compositionally and functionally distinct  
464 sinus microbiota in chronic rhinosinusitis patients have immunological and clinically divergent  
465 consequences. *Microbiome*. 2017;5:53.
- 466 29. Thickett KM, McCoach JS, Gerber JM, Sadhra S, Burge PS. Occupational asthma caused  
467 by chloramines in indoor swimming-pool air. *Eur Respir J*. 2002;19:827–32.

- 468 30. Helenius I, Haahtela T. Allergy and asthma in elite summer sport athletes. *J Allergy Clin*  
469 *Immunol.* 2000;106:444–52.
- 470 31. Laux C, Peschel A, Krismer B. Staphylococcus aureus Colonization of the Human Nose and  
471 Interaction with Other Microbiome Members. *Microbiol Spectr* [Internet].. 2019;7. Available from:  
472 <http://dx.doi.org/10.1128/microbiolspec.GPP3-0029-2018>
- 473 32. Proctor DM, Relman DA. The Landscape Ecology and Microbiota of the Human Nose,  
474 Mouth, and Throat. *Cell Host Microbe.* 2017;21:421–32.
- 475 33. Hardy BL, Dickey SW, Plaut RD, Riggins DP, Stibitz S, Otto M, et al. *Corynebacterium*  
476 *pseudodiphtheriticum* Exploits *Staphylococcus aureus* Virulence Components in a Novel  
477 Polymicrobial Defense Strategy. *MBio* [Internet].. 2019;10. Available from:  
478 <http://dx.doi.org/10.1128/mBio.02491-18>
- 479 34. Ramsey MM, Freire MO, Gabriliska RA, Rumbaugh KP, Lemon KP. *Staphylococcus aureus*  
480 Shifts toward Commensalism in Response to *Corynebacterium* Species. *Front Microbiol.*  
481 2016;7:1230.
- 482 35. Meadow JF, Bateman AC, Herkert KM, O'Connor TK, Green JL. Significant changes in the  
483 skin microbiome mediated by the sport of roller derby. *PeerJ.* 2013;1:e53.
- 484 36. Kennedy JL, Hubbard MA, Huyett P, Patrie JT, Borish L, Payne SC. Sino-nasal outcome  
485 test (SNOT-22): a predictor of postsurgical improvement in patients with chronic sinusitis. *Ann*  
486 *Allergy Asthma Immunol.* 2013;111:246–51.e2.
- 487 37. Thompson LR, The Earth Microbiome Project Consortium, Sanders JG, McDonald D, Amir  
488 A, Ladau J, et al. A communal catalogue reveals Earth's multiscale microbial diversity  
489 [Internet].. *Nature.* 2017. p. 457–63. Available from: <http://dx.doi.org/10.1038/nature24621>
- 490 38. Caporaso JG, Lauber CL, Walters WA, Berg-Lyons D, Huntley J, Fierer N, et al. Ultra-high-  
491 throughput microbial community analysis on the Illumina HiSeq and MiSeq platforms. *ISME J.*  
492 2012;6:1621–4.
- 493 39. Bolyen E, Rideout JR, Dillon MR, Bokulich NA, Abnet CC, Al-Ghalith GA, et al.  
494 Reproducible, interactive, scalable and extensible microbiome data science using QIIME 2. *Nat*  
495 *Biotechnol* [Internet].. 2019; Available from: <http://dx.doi.org/10.1038/s41587-019-0209-9>
- 496 40. Callahan BJ, McMurdie PJ, Rosen MJ, Han AW, Johnson AJA, Holmes SP. DADA2: high-  
497 resolution sample inference from Illumina amplicon data. *Nat Methods.* Nature Publishing  
498 Group; 2016;13:581.
- 499 41. Katoh K, Standley DM. MAFFT multiple sequence alignment software version 7:  
500 improvements in performance and usability. *Mol Biol Evol.* 2013;30:772–80.
- 501 42. Price MN, Dehal PS, Arkin AP. FastTree 2--approximately maximum-likelihood trees for  
502 large alignments. *PLoS One.* 2010;5:e9490.
- 503 43. Pedregosa F, Varoquaux G, Gramfort A, Michel V, Thirion B, Grisel O, et al. Scikit-learn:  
504 Machine learning in Python. *J Mach Learn Res.* 2011;12:2825–30.
- 505 44. McDonald D, Price MN, Goodrich J, Nawrocki EP, DeSantis TZ, Probst A, et al. An  
506 improved Greengenes taxonomy with explicit ranks for ecological and evolutionary analyses of

- 507 bacteria and archaea. *ISME J.* 2012;6:610–8.
- 508 45. Faith DP, Minchin PR, Belbin L. Compositional dissimilarity as a robust measure of  
509 ecological distance. *Vegetatio.* 1987;69:57–68.
- 510 46. Lozupone C, Knight R. UniFrac: a new phylogenetic method for comparing microbial  
511 communities. *Appl Environ Microbiol.* 2005;71:8228–35.
- 512 47. Kruskal WH, Wallis WA. Use of Ranks in One-Criterion Variance Analysis. *J Am Stat Assoc.*  
513 Taylor & Francis; 1952;47:583–621.
- 514 48. Anderson MJ. A new method for non-parametric multivariate analysis of variance. *Austral*  
515 *Ecol. Wiley Online Library;* 2001;26:32–46.
- 516 49. Lévesque B, Duchesne J-F, Gingras S, Lavoie R, Prud’Homme D, Bernard E, et al. The  
517 determinants of prevalence of health complaints among young competitive swimmers. *Int Arch*  
518 *Occup Environ Health.* 2006;80:32–9.
- 519 50. Wagner Mackenzie B, Waite DW, Hoggard M, Douglas RG, Taylor MW, Biswas K. Bacterial  
520 community collapse: a meta-analysis of the sinonasal microbiota in chronic rhinosinusitis.  
521 *Environ Microbiol.* 2017;19:381–92.
- 522 51. McCauley K, Durack J, Valladares R, Fadrosch DW, Lin DL, Calatroni A, et al. Distinct nasal  
523 airway bacterial microbiotas differentially relate to exacerbation in pediatric patients with  
524 asthma. *J Allergy Clin Immunol [Internet].* 2019; Available from:  
525 <http://dx.doi.org/10.1016/j.jaci.2019.05.035>
- 526
- 527
- 528
- 529
- 530
- 531
- 532
- 533
- 534
- 535
- 536
- 537
- 538

539 **Figure Legends.**

540 **Fig. 1.** Sampling schematic for athletes on a Swim/Dive or Basketball team. Swim/Dive  
541 participants took up to five nasal samples from September 2017 to March 2018. Basketball  
542 participants took up to four nasal swabs from October 2017 to March 2018.

543

544 **Figure 2.** Diversity analysis across athletic teams. Magnitude of change in bacterial richness  
545 compared to each prior sampling point [first differences, (A)]. and to baseline richness [first  
546 sampling per team; (B)]. demonstrates no significant difference across athletic team or sampling  
547 time point ( $p > 0.05$ , Kruskal Wallis). Faded thin lines demonstrate the longitudinal trajectory of  
548 individuals, thick colored lines represent the mean change and standard deviation across non-  
549 chlorine exposed (Basketball) and chlorine-exposed (Swim/Dive) athletes. PCoA of Jaccard (C)  
550 and Bray-Curtis (D) distance matrices showing significant clustering by team across each  
551 sampling points matched by month (x-axis).

552

553 **Figure 3.** Longitudinal change in Jaccard (A) and Bray-Curtis (B) distances between successive  
554 samples (first distances) from chlorine-exposed (Swim/Dive) and unexposed (Basketball)  
555 athletes. Athletes who were not exposed to chlorine during the athletic season had more similar  
556 nasal microbiota when measured using Jaccard but not Bray-Curtis dissimilarity metric, at the  
557 end of the sampling period compared to the baseline sample whereas athletes who were  
558 chronically exposed to chlorine had less similar nasal microbiota compared to baseline and prior  
559 sampling timepoints (Jaccard,  $p = 0.02$ , Kruskal Wallis; Bray-Curtis  $p = 0.45$  Kruskal Wallis).

560

561 **Figure 4.** Random Forest regression of feature abundance over time. Two high abundance  
562 features were predictive of sampling time point. A) *Staphylococcus* abundance increased over  
563 time in participants on the Swim/Dive team, but remained relatively stable in participants on the  
564 Basketball team (feature importance score=0.064, net average change=0.1442). B)

565 *Corynebacterium* abundance decreased over time in participants on both teams (feature  
566 importance score=0.008, net average change= -0.1070).

567

568

569

570

571

572

573

574

575

576

577

578

579

580

581

582

583

584

585

586

587

588

589

590

591

592 **Figure 1. Sampling Timeline**

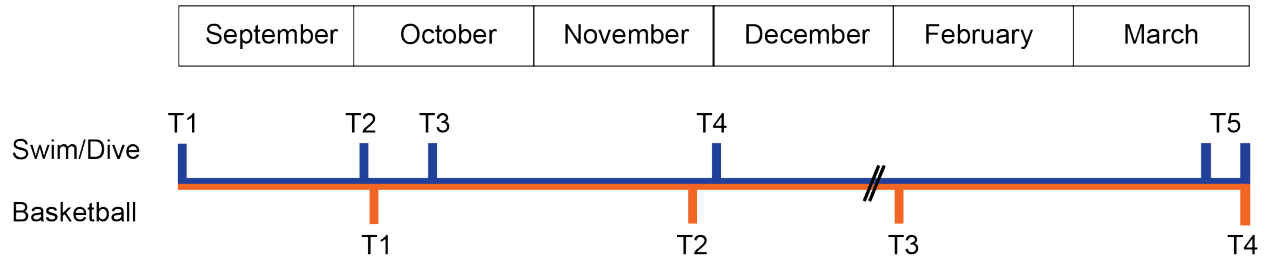

593

594

595

596

597

598

599

600

601 **Figure 2. Temporal Changes in Richness and Beta-Diversity.**

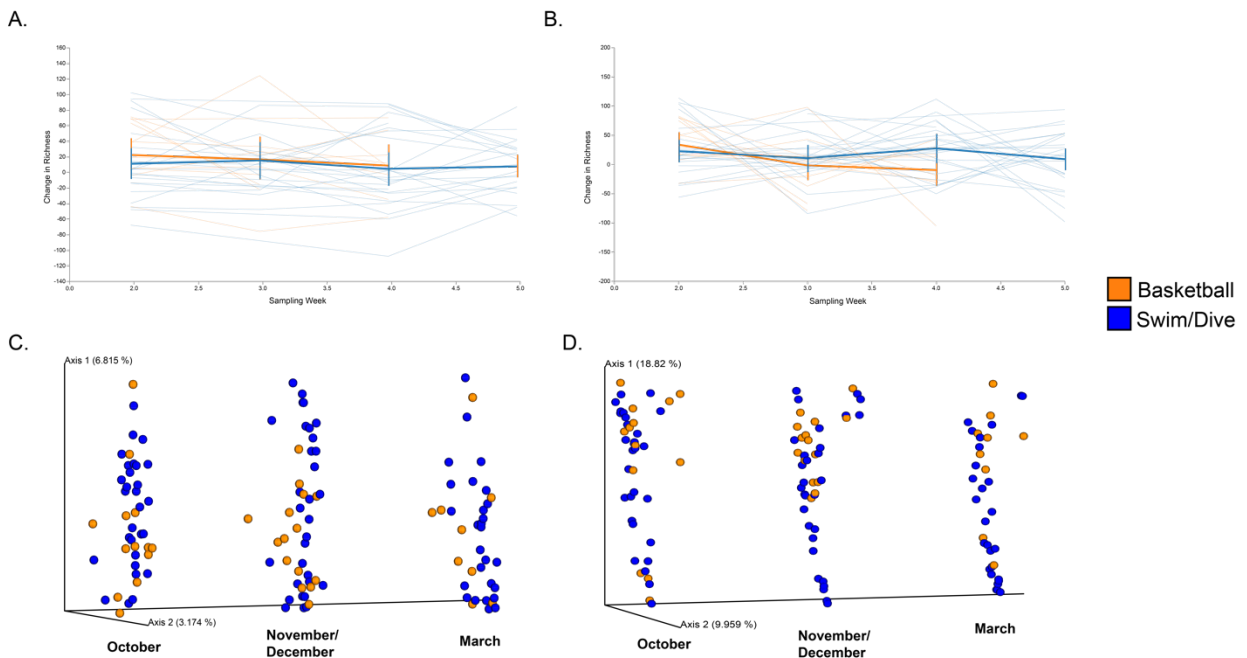

602

603

604 **Figure 3. Magnitude Change in Jaccard and Bray-Curtis Over Successive Timepoints.**

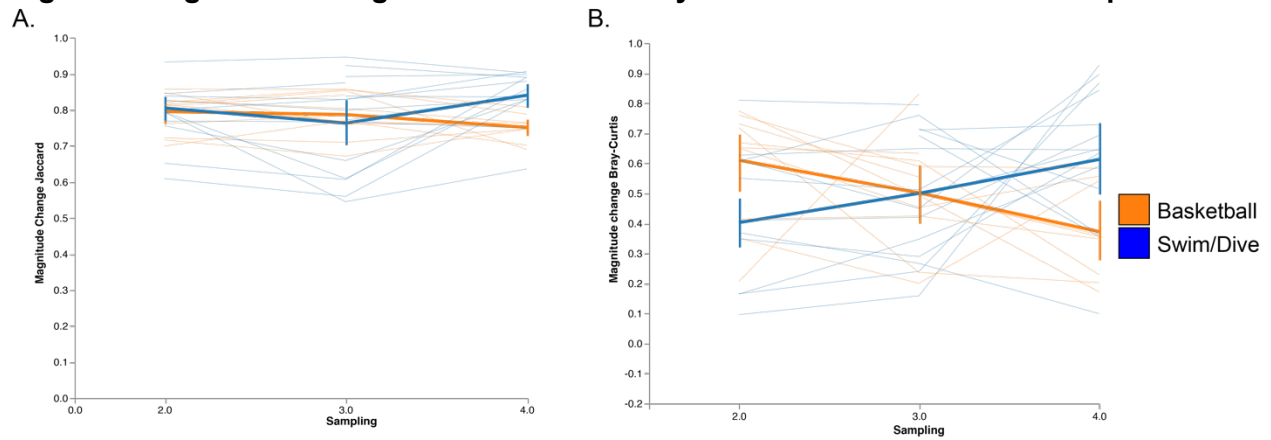

605

606

607

608

609

610

611

612

613

614

615

616

617

618

619

620

621

622

623

624

625

626 **Figure 4. Random Forest Regression Identified Change of Important Features Over Time.**

A.

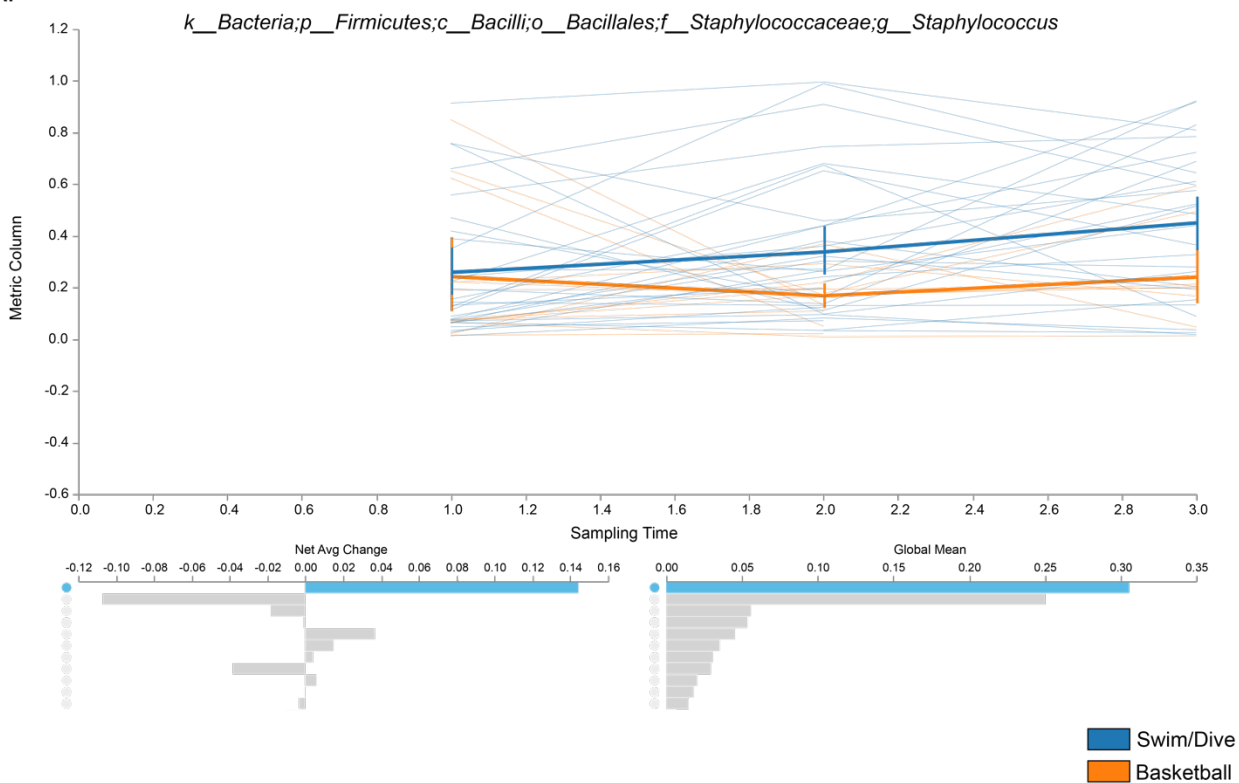

B.

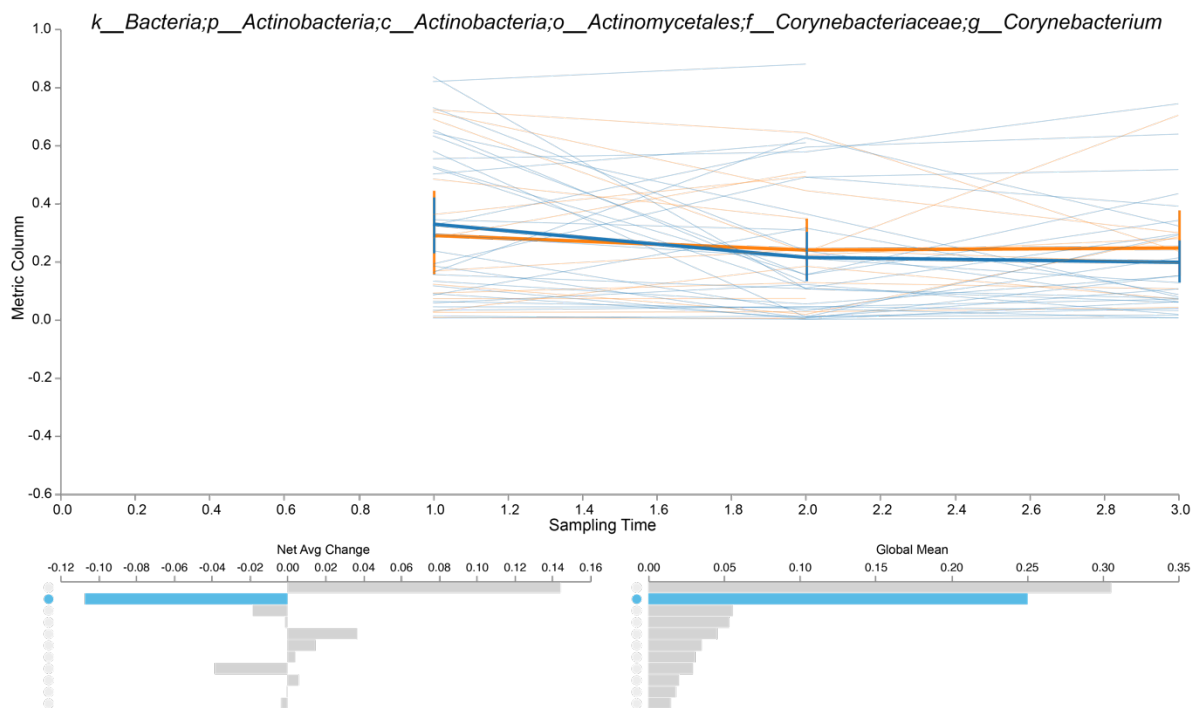

627
